# Supplementary material for: Discovery of a Novel Antimicrobial Peptide, Temporin-PKE, from the Skin Secretion of Pelophylax kl. esculentus, and Evaluation of Its Structure-Activity Relationships
Source: MDPI journal article supplement (doi:10.3390/biom12060759), 2022-05-29

## Supplementary Material

**Figure S1.** The RP-HPLC chromatograms of (a) temporin-PKE, (b) temporin-PKE-2K, (c) temporin-PKE-K<sub>12</sub>, (d) temporin-PKE-3K, (e) temporin-PKE-4K, (f) temporin-PKE-i and (g) temporin-PKE-3i. The elution peak of each peptide is indicated by an arrow.

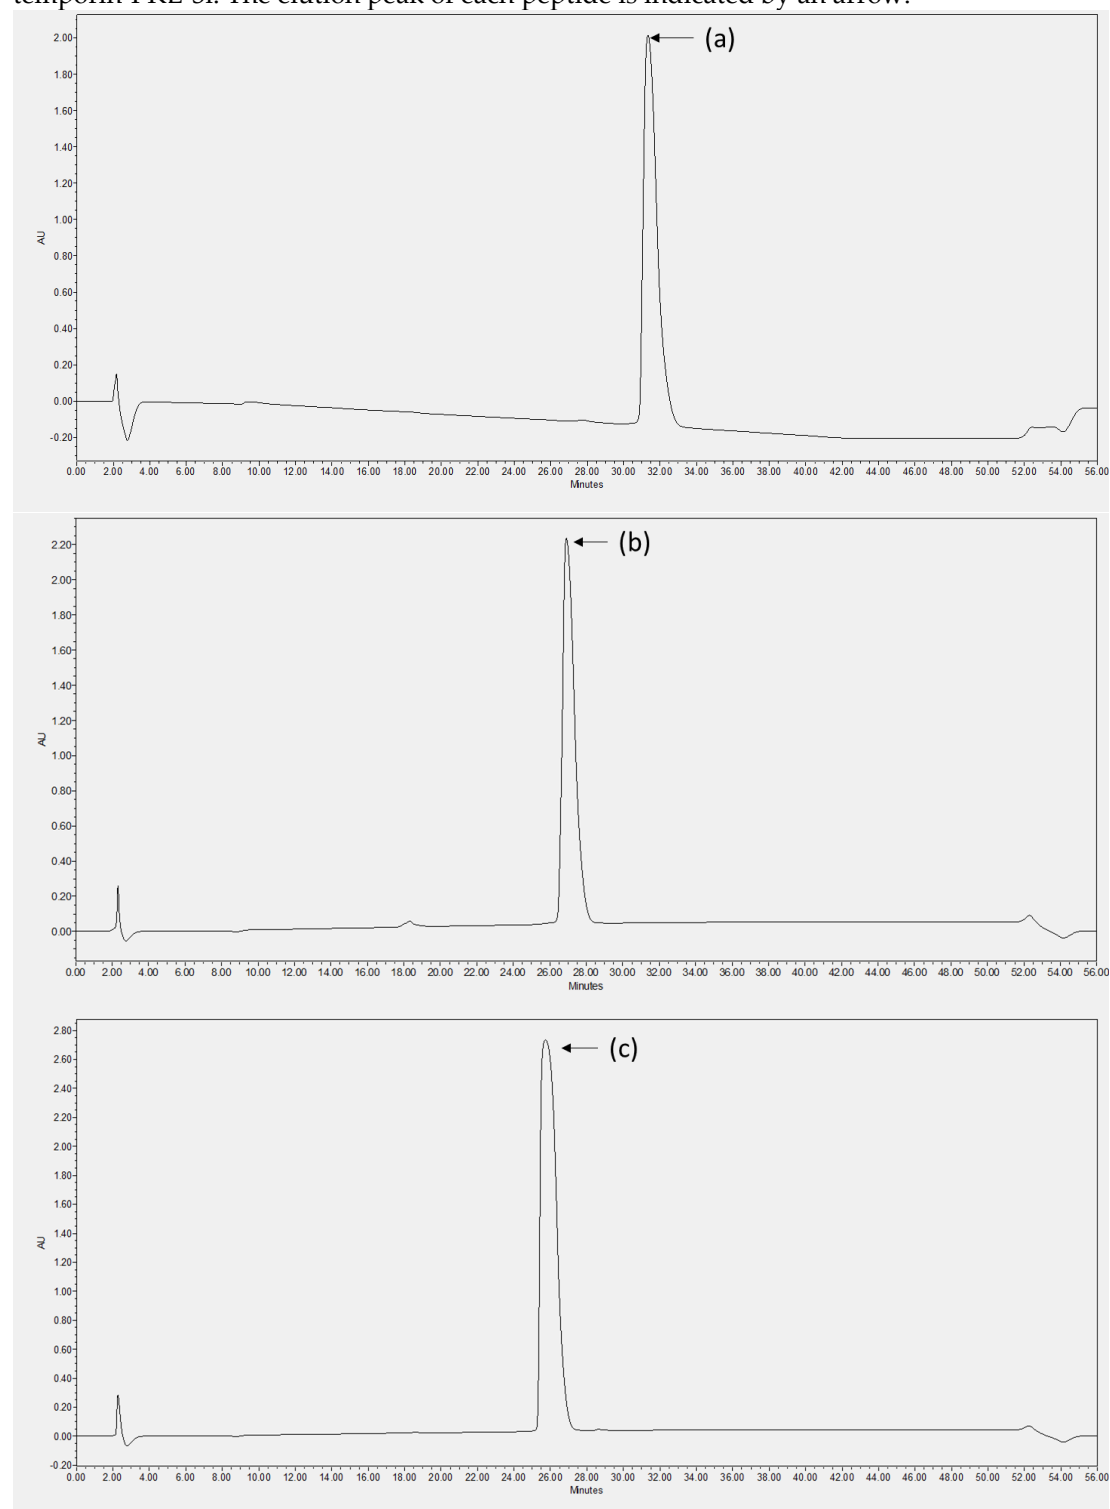

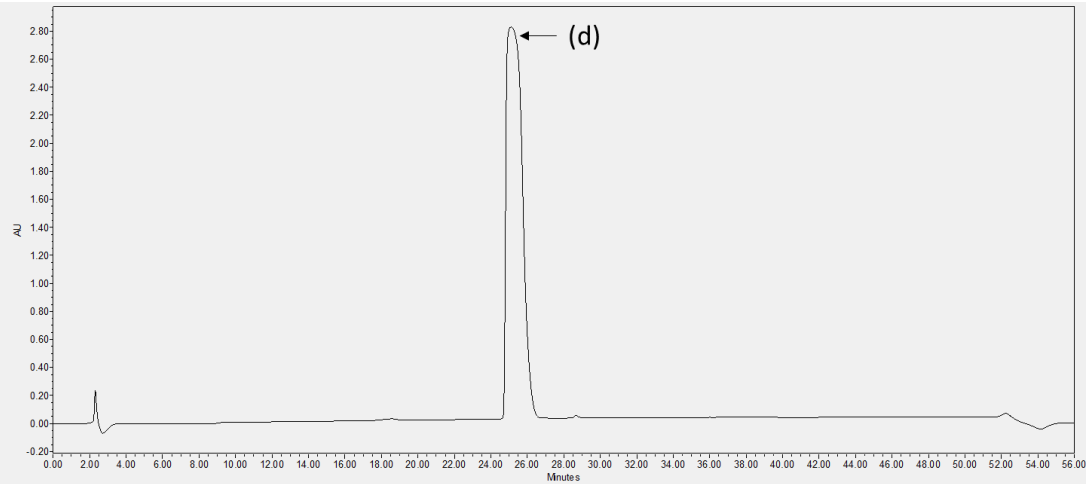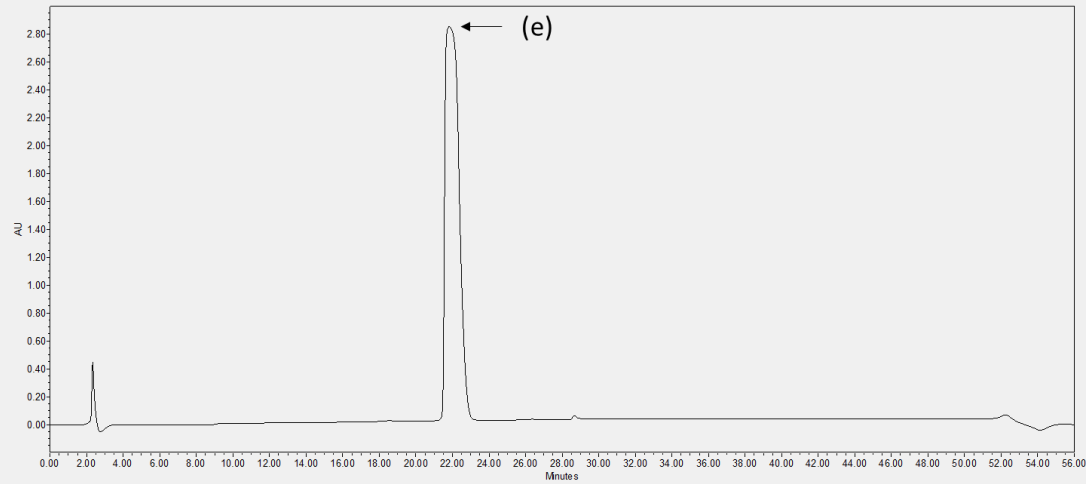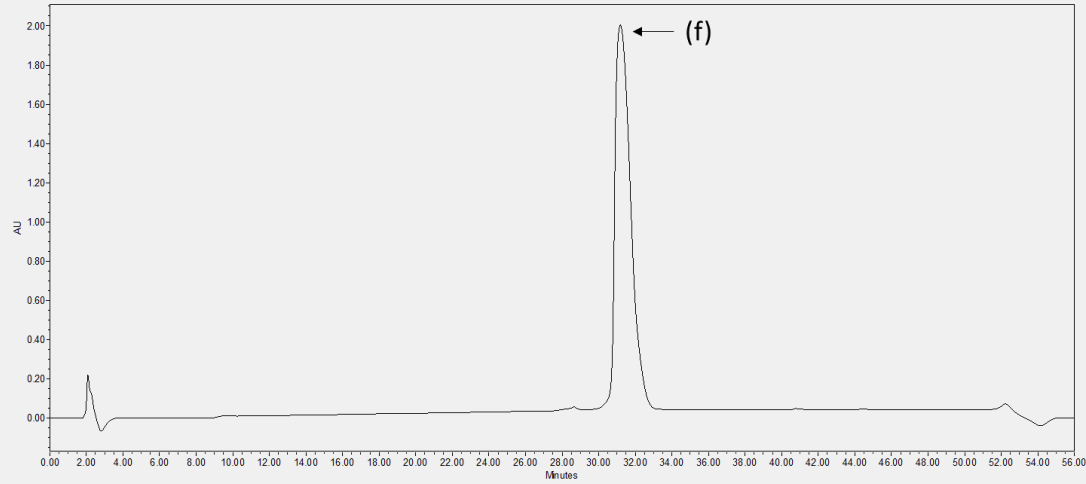

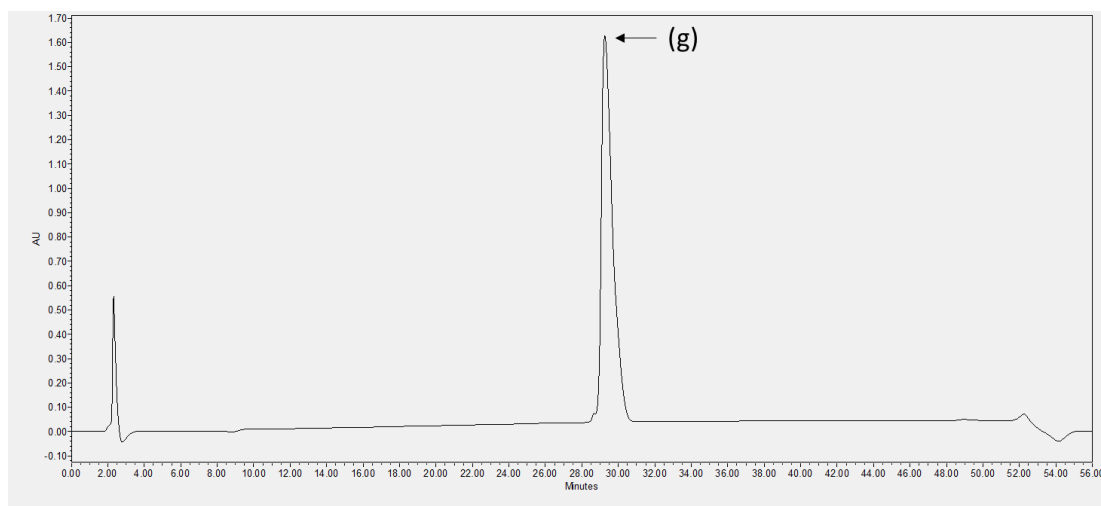

**Figure S2.** The mass spectra of (a) temporin-PKE, (b) temporin-PKE-2K, (c) temporin-PKE-K<sub>12</sub>, (d) temporin-PKE-3K, (e) temporin-PKE-4K, (f) temporin-PKE-i and (g) temporin-PKE-3i obtained from MALDI-TOF MS. The observed  $[M+H]^+$  ions and the sodium adduct (+Na) and potassium adduct (+K) ions are indicated by arrows.

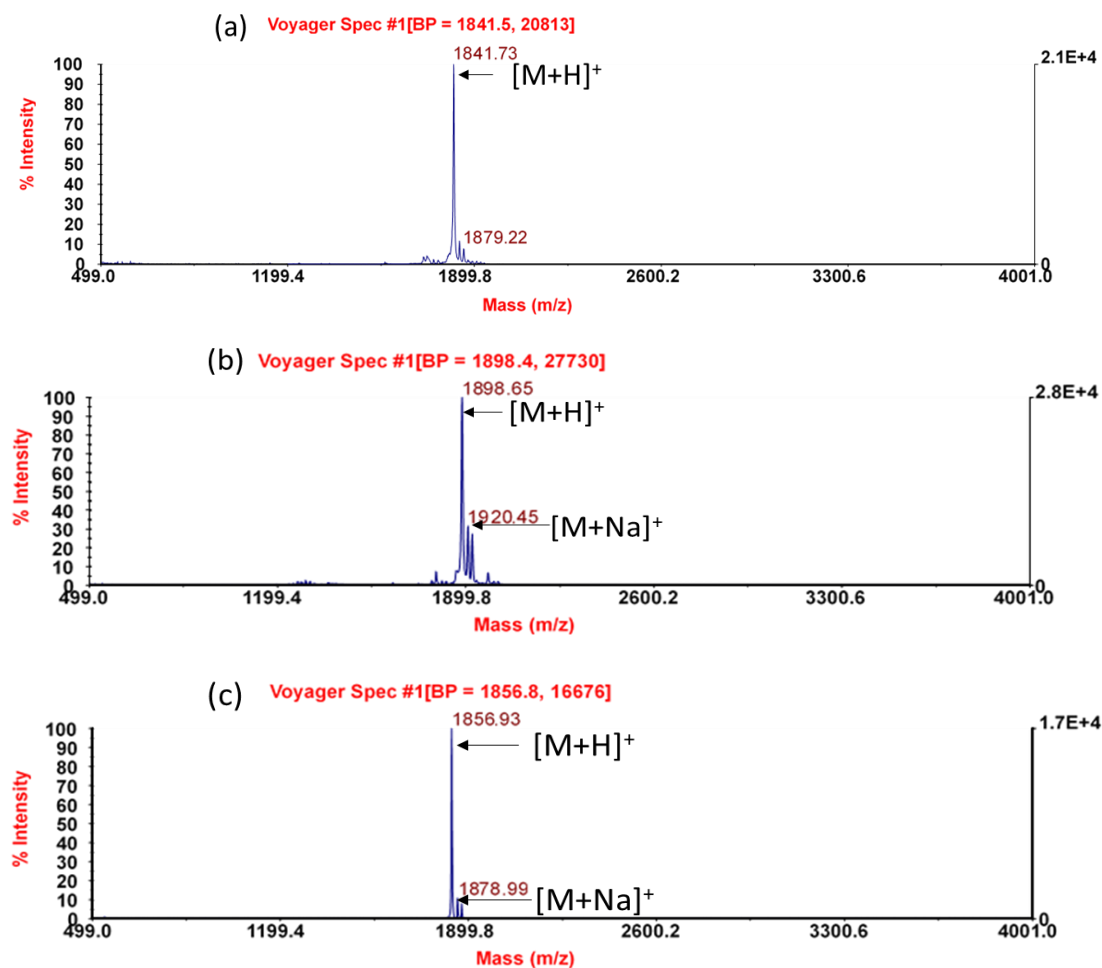

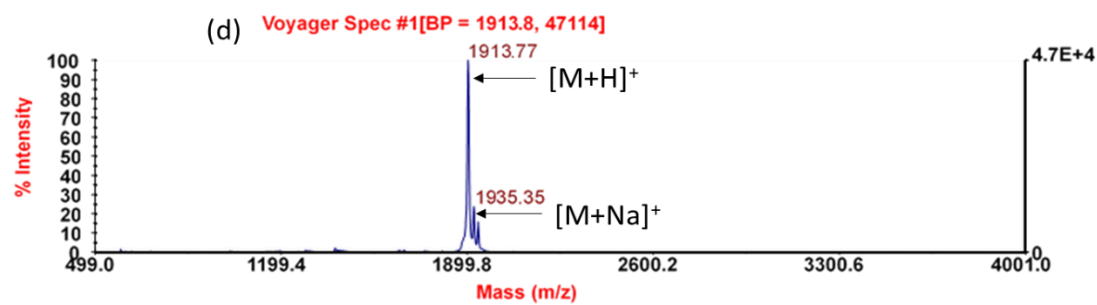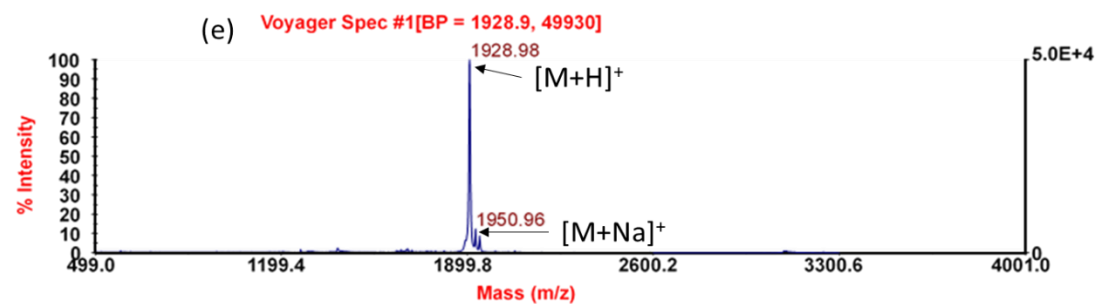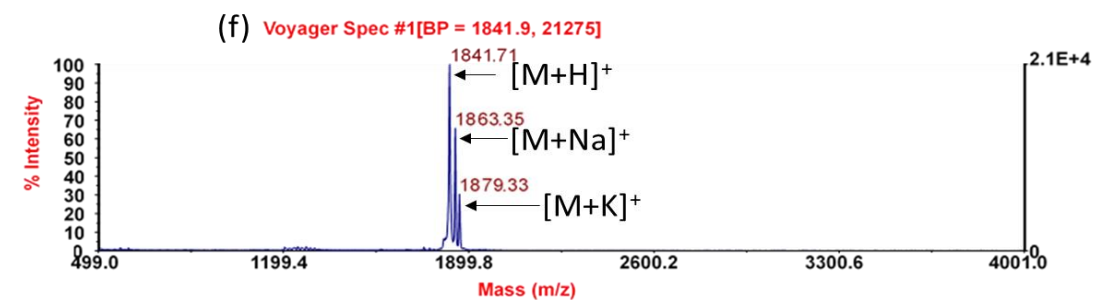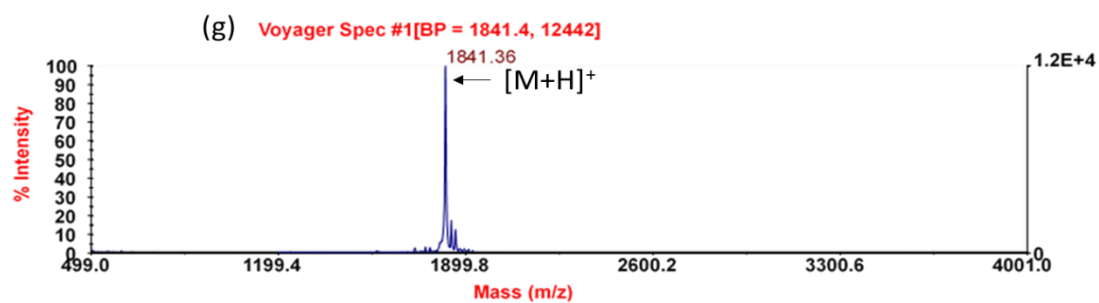

Supplement: s1 [file s1]
